# Supplementary material for: Evaluating fast methods for static polarizabilities on extended conjugated oligomers
Source: Royal Society of Chemistry journal article supplement (doi:10.1039/d2cp02375j), 2022-01-01
Supplement: d2cp02375j1.pdf [file d2cp02375j1.pdf]

## Supplementary Information

| Hexamer ID         | GFN2 (Å <sup>3</sup> ) | ORCA (Å <sup>3</sup> ) | Gaussian (Å <sup>3</sup> ) |
|--------------------|------------------------|------------------------|----------------------------|
| B:1073-1156-000011 | 205.010                | 1281.299               | 1278.897                   |
| C:520-515-111111   | 184.176                | 1339.674               | 1339.809                   |

Table S1 Outlier Polarizability Comparison

| Hexamer ID     | Tanimoto Coefficient |
|----------------|----------------------|
| 520-515-111111 | 0.535                |
| 154-515-001100 | 0.384                |
| 71-515-101010  | 0.355                |
| 222-364-001000 | 0.261                |
| 337-515-101010 | 0.241                |

Table S2 Top 5 Chemically Similar Wide Range Set Molecules to Outlier A (222-515-111100)

| Hexamer ID       | Tanimoto Coefficient |
|------------------|----------------------|
| 1175-67-010101   | 0.324                |
| 496-979-000011   | 0.263                |
| 1130-1192-010111 | 0.262                |
| 104-680-100010   | 0.242                |
| 930-485-000100   | 0.239                |

Table S3 Top 5 Chemically Similar Wide Range Set Molecules to Outlier B (1073-1156-000011)

| Hexamer ID     | Tanimoto Coefficient |
|----------------|----------------------|
| 222-515-111100 | 0.535                |
| 71-515-101010  | 0.427                |
| 154-515-001100 | 0.375                |
| 337-515-101010 | 0.257                |
| 411-525-000000 | 0.228                |

Table S4 Top 5 Chemically Similar Wide Range Set Molecules to Outlier C (520-515-111111)

| PubChemQC ID | Gaussian $\omega$ B97XD (Å <sup>3</sup> ) | ORCA $\omega$ B97X (Å <sup>3</sup> ) |
|--------------|-------------------------------------------|--------------------------------------|
| 10844636     | 15.8972868                                | 15.78617472                          |
| 19800353     | 31.9664682                                | 31.60996769                          |
| 21545508     | 23.31098235                               | 23.09620301                          |
| 65163876     | 26.31024675                               | 26.07089537                          |

Table S5 Polarizability Method Comparison for PubChemQC Sample

The MAE comparing ORCA  $\omega$ B97X to Gaussian  $\omega$ B97XD for this sample of the PubChemQC subset is 0.184 Å<sup>3</sup>, which equates to approximately 0.7% error on the scale of this sample set.

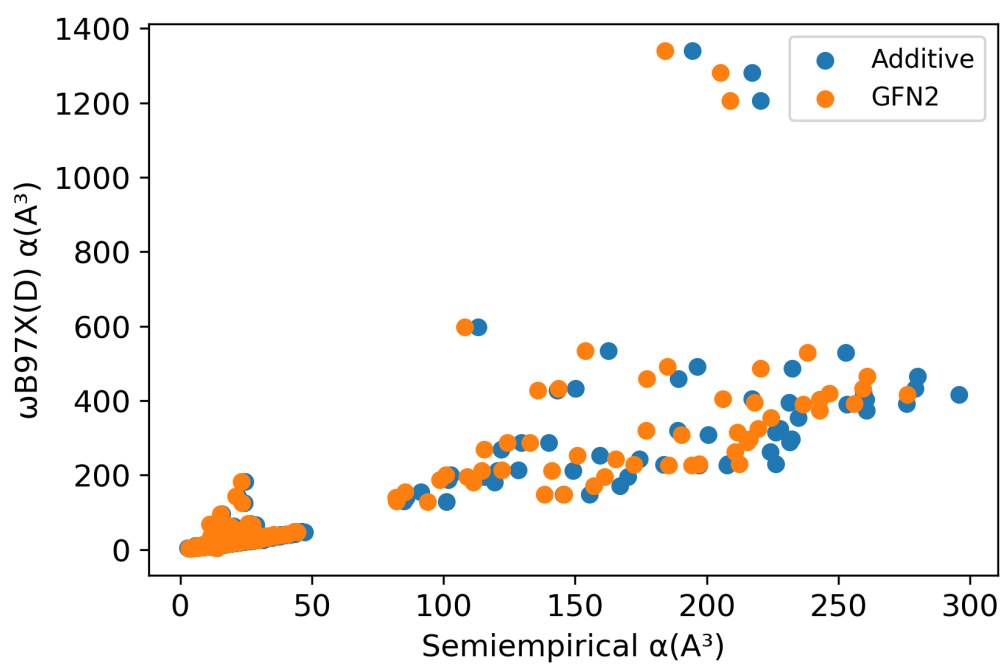

Fig. S1 Comparison of additive model and GFN2 polarizabilities to DFT results.

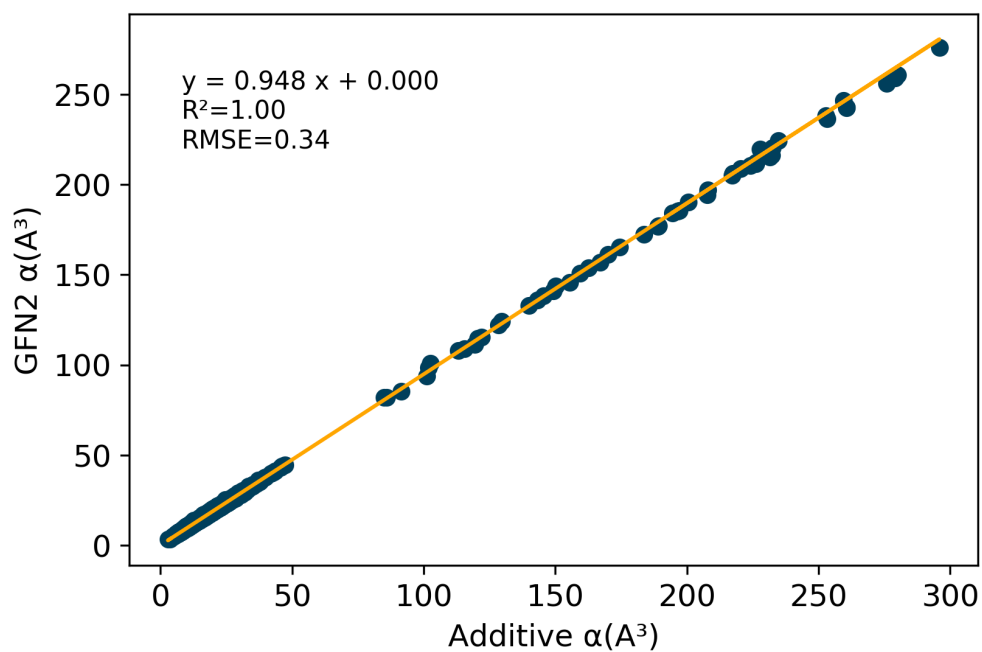

Fig. S2 Strong correlation is shown between GFN2 and additive model polarizabilities.

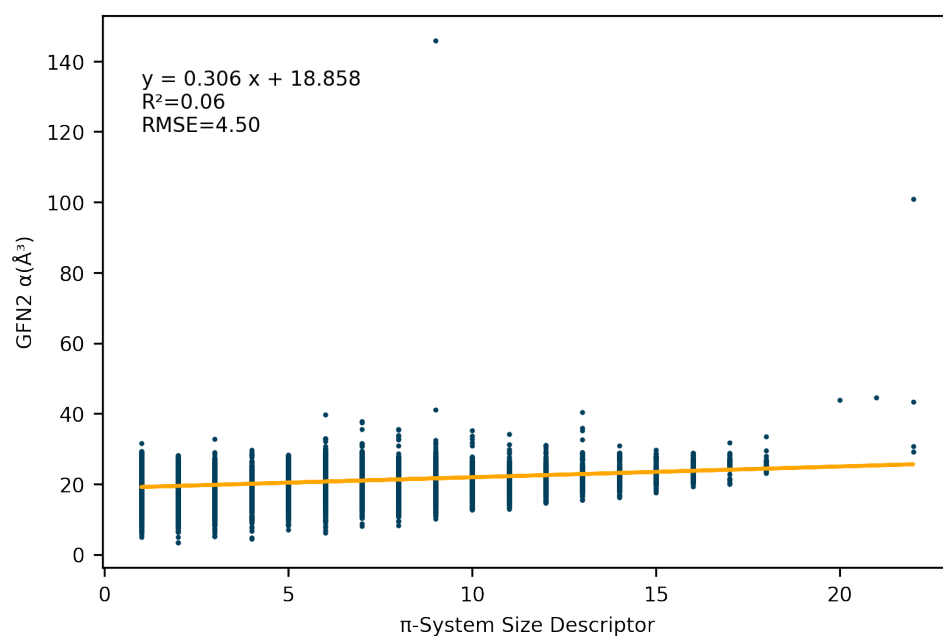

Fig. S3 Almost no correlation is shown between GFN2/D4 calculated polarizabilities and a  $\pi$ -system size descriptor for molecules with 25 or fewer  $\pi$ -systems.

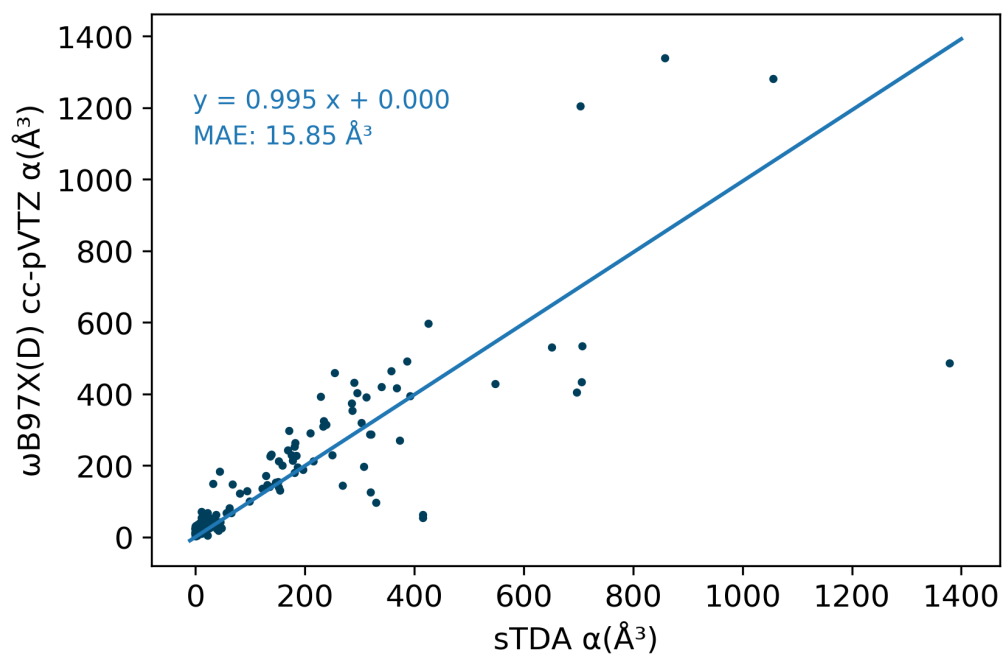

Fig. S4 sTDA-xTB shows worse correlation with DFT than GFN2.

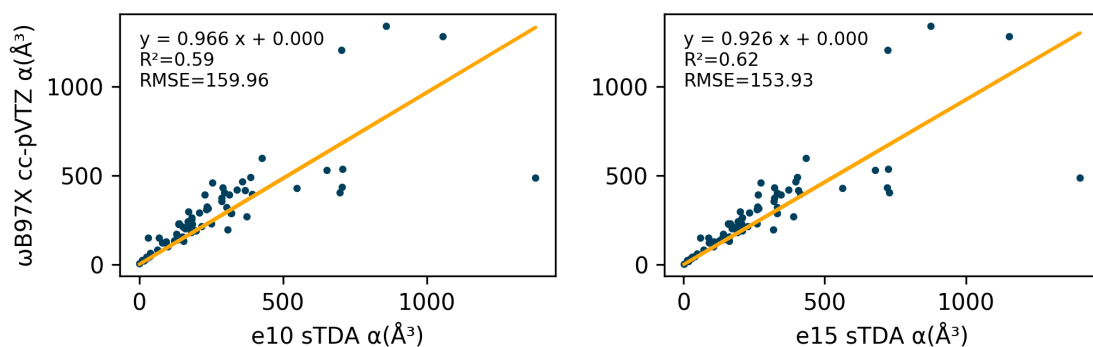

Fig. S5 Comparison of DFT vs sTDA isotropic polarizability results for wide range molecule set. Energy thresholds used for sTDA calculations are noted as their keyword arguments: e10 for 10 eV and e15 for 15 eV.

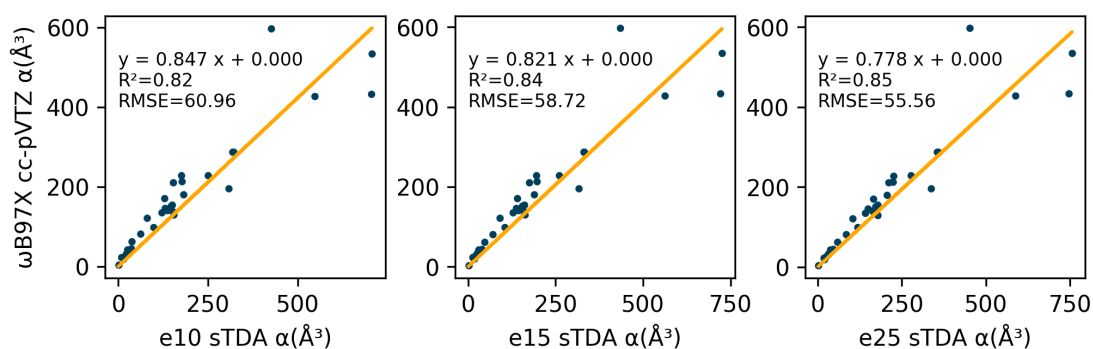

Fig. S6 Comparison of DFT vs sTDA isotropic polarizability results for the 34 members of the wide range molecule set we were able to successfully run sTDA with a 25 eV energy threshold. Energy thresholds used for sTDA calculations are noted as their keyword arguments: e10 for 10 eV, e15 for 15 eV, and e25 for 25 eV.

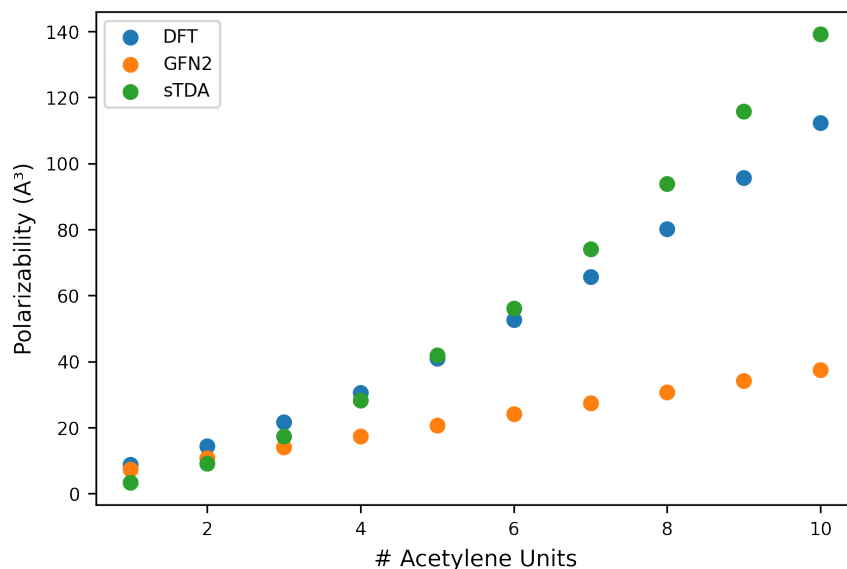

Fig. S7 Comparison of isotropic polarizabilities calculated for polyacetylene oligomers of increasing length using DFT with the  $\omega$ B97X functional and the cc-pVTZ basis set corrected to aug-cc-pVTZ accuracy using our linear correction from Figure S13, GFN2, and sTDA.

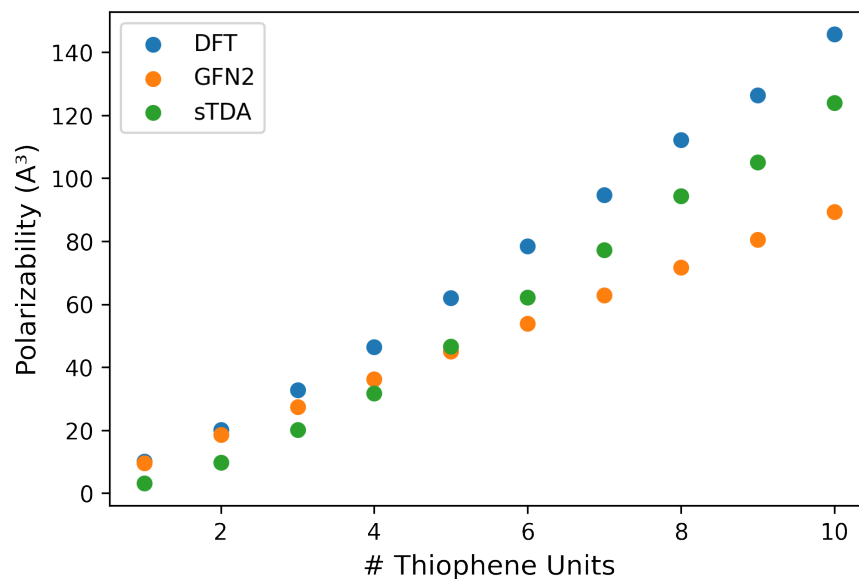

Fig. S8 Comparison of isotropic polarizabilities calculated for polythiophene oligomers of increasing length using DFT with the  $\omega$ B97X functional and the cc-pVTZ basis set corrected to aug-cc-pVTZ accuracy using our linear correction from Figure S13, GFN2, and sTDA.

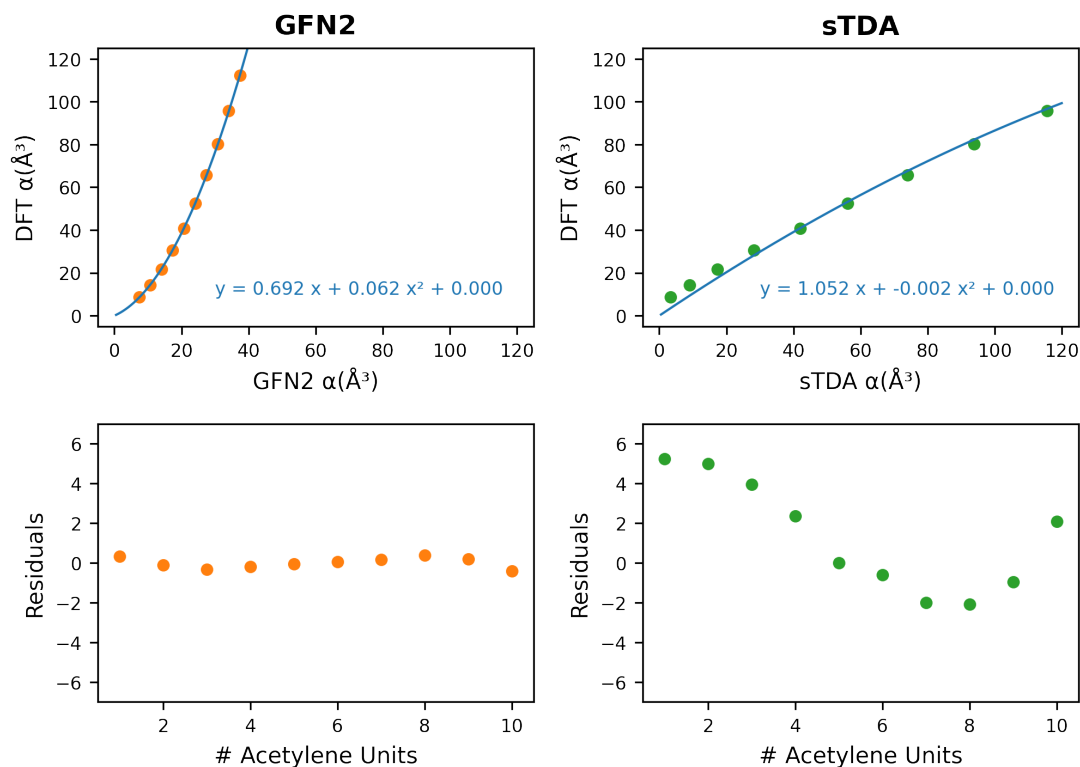

Fig. S9 Quadratic regression with forced zero intercept of isotropic polarizabilities calculated for polyacetylene oligomers of increasing length using DFT with the  $\omega$ B97X functional and the cc-pVTZ basis set corrected to aug-cc-pVTZ accuracy using our linear correction from Figure S13 and GFN2 and sTDA. The residuals from the DFT vs. GFN2 regression are notably smaller than those from the DFT vs. sTDA regression, indicating the latter's larger random error.

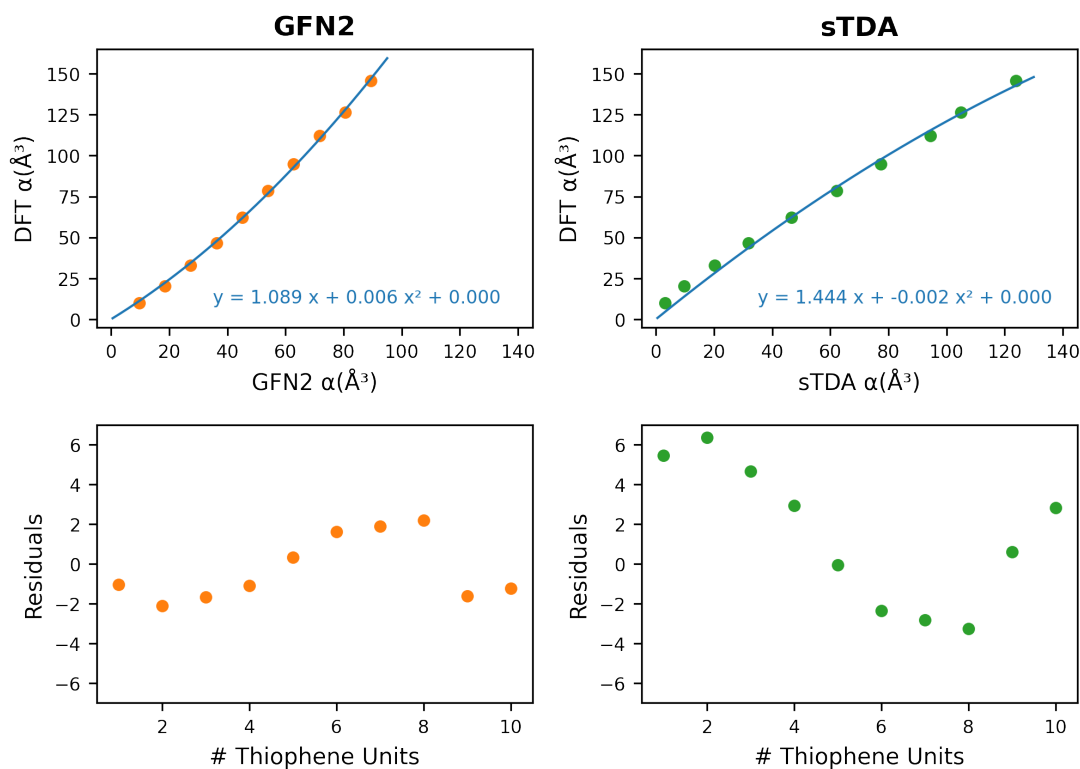

Fig. S10 Quadratic regression with forced zero intercept of isotropic polarizabilities calculated for polythiophene oligomers of increasing length using DFT with the  $\omega$ B97X functional and the cc-pVTZ basis set corrected to aug-cc-pVTZ accuracy using our linear correction from Figure S13 and GFN2 and sTDA. The residuals from the DFT vs. GFN2 regression are notably smaller than those from the DFT vs. sTDA regression, indicating the latter's larger random error.

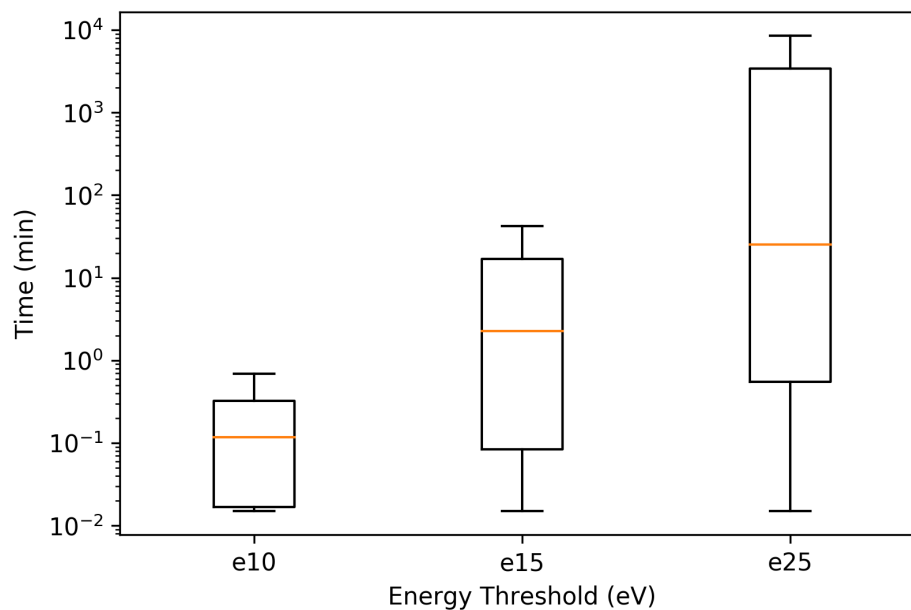

Fig. S11 Timing data for sTDA calculations for the 34 members of the wide range molecule set we were able to successfully run sTDA with a 25 eV energy threshold. Note that the 15 hexamers in this set were run on four cores instead of one, so their raw calculation times were quadrupled and should be considered an estimate. Energy thresholds used for sTDA calculations are noted as their keyword arguments: e10 for 10 eV and e15 for 15 eV.

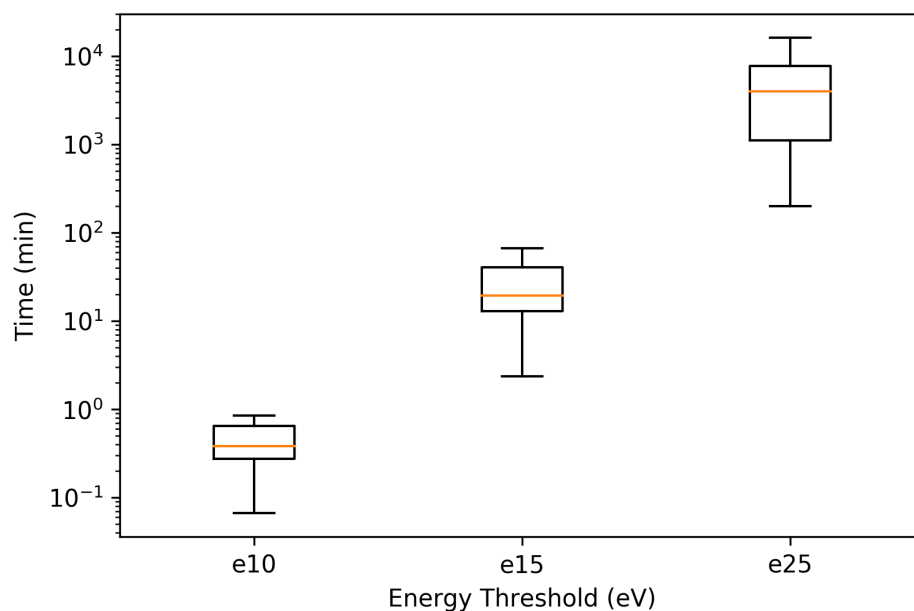

Fig. S12 Timing data for sTDA calculations on subset of 15 hexamers. Note that the 15 hexamers in this set were run on four cores instead of one, so their raw calculation times were quadrupled and should be considered an estimate. Energy thresholds used for sTDA calculations are noted as their keyword arguments: e10 for 10 eV and e15 for 15 eV.

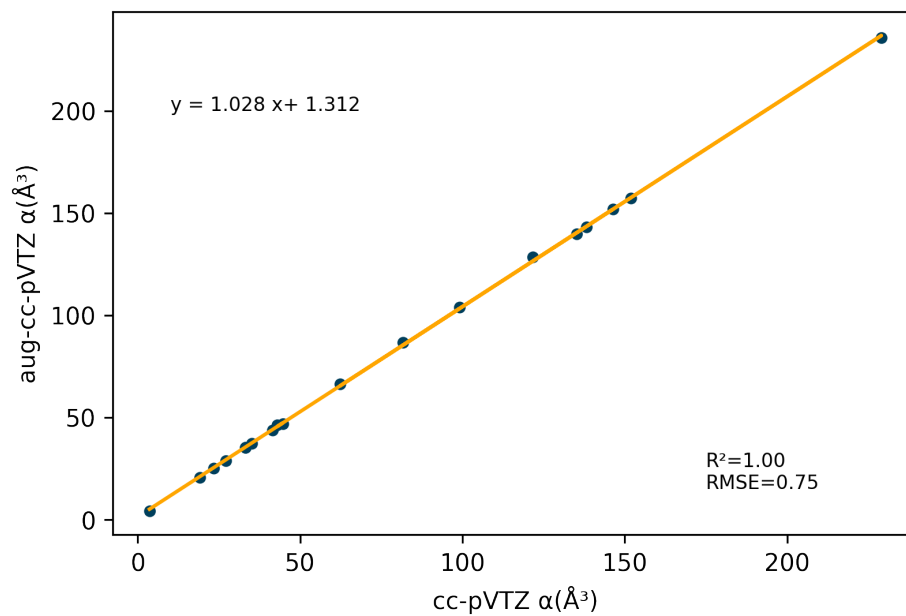

Fig. S13 Linear regression performed on isotropic polarizabilities calculated with cc-pVTZ and aug-pVTZ basis sets shows a suggested linear correction to improve results calculated with the former basis set to the accuracy of the latter.
